# Supplementary material
Source: publisher figshare collection journal article supplement (https://sage.figshare.com/ndownloader/files/21301218)
Supplement: Supplementary file 1 [file 21301218]

## FIGURE LEGENDS FOR SUPPLEMENTAL FIGURES

**Figure.S1** The suture coming in at the core of the tendon stump “a” and coming out to the periphery at 10 mm purchase length at the point 0° and doing a 2 mm grasp, the suture crosses transversely the tendon to 180° point and the 2 mm grasp is made coming out through the tendon stump core.

**Figure.S2** At the tendon stump “b”, the suture coming in at the core of the tendon stump and coming out to the periphery at 10 mm purchase length at the point 60° and doing a 2 mm grasp, the suture crosses transversely the tendon to 240° point and the 2 mm grasp is made coming out through the tendon stump core.

**Figure.S3** In the same way like the step 1 and 2, the suture crosses transversely the tendon stump “a” from the 60° point to 240° point.

**Figure.S4** The suture crosses transversely the tendon stump “b” from the 0° point to 180° point.

**Figure.S5** The suture crosses transversely the tendon stump “a” from the 120° point to 300° point.

**Figure.S6** The suture crosses transversely the tendon stump “b” from the 300° point to 120° point.

**Figure.S7** Configuration of Adelaide tendon repair and Modified Kessler Tendon repair

**Figure.S8** Repaired tendon mounted on universal testing machine

**Figure.S9** Force [N] - extension [mm] ratio in helical tendon repairs

**Figure.S10** Stress [MPa] – strain ratio in helical tendon repairs

**Figure.S11** Ultimate tensile strength for each type of tendon repair
